1 Running Title: Salt tolerance QTL derived from the Bangladeshi landrace *Horkuch*

2

3 Natural variation in growth and physiology under salt stress in rice: QTL mapping in a *Horkuch*  
4 × IR29 mapping population at seedling and reproductive stages

5 Taslima Haque<sup>1,2†</sup>, Sabrina M Elias<sup>1,4,6†</sup>, Samsad Razzaque<sup>1,2†</sup>, Sudip Biswas<sup>1</sup>, Sumaiya Farah  
6 Khan<sup>1,5</sup>, G.M. Nurnabi Azad Jewel<sup>1</sup>, Md. Sazzadur Rahman<sup>3</sup>, Thomas E. Juenger<sup>2</sup> and Zeba I  
7 Seraj<sup>1\*</sup>

8

9 <sup>1</sup>Plant Biotechnology Lab, Department of Biochemistry and Molecular Biology, University of  
10 Dhaka, Dhaka-1000, Bangladesh

11 <sup>2</sup>Department of Integrative Biology and Institute for Cellular and Molecular Biology, University  
12 of Texas, Austin, Texas 78712, USA

13 <sup>3</sup>Plant Physiology Division, Bangladesh Rice Research Institute, Gazipur, Bangladesh

14 <sup>4</sup>Department of Agronomy and Horticulture, University of Nebraska, Lincoln, Nebraska 68583,  
15 USA

16 <sup>5</sup>Department of Biochemistry and Molecular Biology, Jagannath University, Dhaka-1100,  
17 Bangladesh

18 <sup>6</sup>School of Life Science, Independent University, Dhaka-1229, Bangladesh

19 †Contributed equally

20

21 **\*Correspondence:**

22 Zeba I Seraj

23 [zebai@du.ac.bd](mailto:zebai@du.ac.bd)

24

25

26 **Highlights:**

27 We identified QTL for salt tolerance response for two different developmental stages of rice  
28 plant and detected a significant contribution of cytoplasm-nuclear genome interaction for few  
29 traits.

30 **Abstract:**

31 Salinity has a significant negative impact on the production of rice yield which will become  
32 severe due to recent climate changes. To cope with this increased soil salinity, we need to  
33 develop salt tolerant rice varieties that can maintaining higher yield. Rice landraces indigenous to  
34 the coastal region of Bangladesh can be a great resource to study the genetic basis of salt  
35 adaptation. In this study, we developed a reciprocal mapping population between a salt tolerant  
36 landrace *Horkuch* and a high yielding rice variety *IR29*. We applied a QTL analysis framework  
37 to identify genetic loci that contributes to salt adaptive responses for two different developmental  
38 stages of salinity treatment. We identified 14 QTL for 9 traits and found most QTL are unique to  
39 the specific developmental stage. Moreover, we discovered a significant effect of the  
40 cytoplasmic genome on the QTL model for some important traits such as leaf total potassium  
41 and filled grain number. This underscores the importance of considering cytoplasm-nuclear  
42 interaction for breeding programs. Along with that, we detected QTL co-localization for multiple  
43 traits that highlights the constraint of multiple QTL selection for breeding program. Overall, in  
44 this study we identified multiple QTL for different physiological and yield related traits for  
45 salinity treatment for two different developmental stages of the rice plant. We detected a  
46 significant contribution of cytoplasm-nuclear genome interaction for many traits. This study also  
47 suggests the selection constraint of donor alleles due to the presence of QTL co-localization.

48 **Keywords: salinity, QTL, reciprocal cross, cytoplasm, crop breeding**

49

## 50 Introduction

51 Rice production, (*Oryza sativa* L.), which feeds almost half of the world population, is under  
52 threat from global environmental changes such as increasing salinity, heat and drought (Seck et  
53 al., 2012; Ashikari and Ma, 2015). Among these abiotic stresses, salinity has already affected 45  
54 million hectares of irrigated land worldwide and 1.5 million additional hectares are impacted  
55 each year (Munns and Tester, 2008). Bangladesh and other locales at or near sea level are  
56 particularly vulnerable to climate change-induced salinity. In Bangladesh, about 30% of the  
57 cultivable land along the coast is affected by salinity due to tidal flood during the wet season  
58 resulting in direct inundation by saline water, and upward or lateral movement of saline ground  
59 water during the dry season (Haque, 2006).

60  
61 High yielding “elite” rice cultivars are especially susceptible to salinity stress. Recent studies  
62 have shown that production of high yielding rice varieties in Bangladesh will decrease by 15.6%  
63 in coastal districts where soil salinity is predicted to exceed 4 deciSiemens per meter ( $\text{dSm}^{-1}$ ) by  
64 2050 (Dasgupta *et al.*, 2014). However, the coastal belt of Bangladesh is enriched with many local  
65 rice landraces, among which a handful are adapted to high-to-moderate soil salinities. The rice  
66 landrace, *Pokkali*, has long been used as a salt tolerant landrace reference. Many other salt-  
67 tolerant landraces such as *Horkuch*, *Ashfal*, *Jatai* and *Balam* from the coastal region of southern  
68 Bangladesh have been identified and are currently grown by farmers in these salt-affected  
69 regions (Lisa *et al.*, 2004; Rahman *et al.*, 2016). Unfortunately, these landraces suffer from low  
70 yield, poor grain quality and longer duration to reach maturity and therefore cannot serve as good  
71 candidates for commercial crop varieties. However, studies of these adapted landraces to  
72 understand their salt tolerant mechanisms can open opportunities to incorporate desired traits to  
73 commercial rice varieties. Therefore, it is important for breeders to identify genetic variants of  
74 salt stress responses in these adapted landraces in order to design highly salt tolerant rice.

75  
76 The effect of salinity on rice growth varies across various developmental stages (Lutts *et al.*,  
77 1995). The rice plant is most sensitive to salinity at the early seedling stage and during panicle  
78 formation, whereas it is relatively tolerant during early germination, active tillering and maturity  
79 (Akbar *et al.*, 1972; Heenan *et al.*, 1988; Lutts *et al.*, 1995; Pearson and Bernstein, 1959; Singh and  
80 Flowers, 2010; Zeng and Shannon, 2000). During salt stress at the early seedling stage, there is a

81 significant decrease of dry matter as well as quantum yield of PSII and a significant increase of  
82 sodium concentration in root, stem and shoot tissue (García Morales *et al.*, 2012). At the  
83 reproductive stage, physiological studies under salinity stress show a significant decrease in  
84 panicle weight, panicle length, primary branches per panicle, filled grains per panicle, total seeds  
85 per panicle, total seed weight per panicle, 1000-seed weight and total seed weight per plant  
86 (Abdullah *et al.*, 2001; Rao *et al.*, 2008). Moradi *et al.* (2003) have however shown that salinity  
87 tolerance at the seedling and reproductive stages is only weakly associated. This emphasizes the  
88 importance of discovering the contributing traits of these two very important growth stages of  
89 rice.

90  
91 The physiological basis of salt tolerance during the early seedling stage is well understood.  
92 Munns and Tester (2008) and Roy (2014) have proposed several physiological mechanisms of  
93 seedling tolerance such as sodium exclusion, compartmentalization of excessive sodium ions  
94 (tissue tolerance) and shoot-ion independent tolerance for early stage tolerance. It has been  
95 reported that *Pokkali* maintain lower shoot  $\text{Na}^+$  accumulation and lower shoot  $\text{Na}^+/\text{K}^+$  ratio under  
96 high salinity compared to sensitive genotypes (Kavitha *et al.*, 2012; Sexcion *et al.*, 2009). The  
97 enhancement of salinity tolerance by constitutive overexpression of the vacuolar  $\text{Na}^+/\text{H}^+$   
98 antiporter gene from *Pokkali* in transgenic rice plants suggest that this landrace may use a tissue  
99 tolerance mechanism to lower shoot  $\text{Na}^+/\text{K}^+$  ratio under high salinity (Amin *et al.*, 2016). Negrao  
100 *et al* genotyped 392 rice accessions by EcoTILLING in order to understand allelic difference for  
101 salt stress. They targeted five known genes that are involved in these different salt tolerant  
102 mechanisms and assembled a set of accessions that represents all the haplotypes present in the  
103 coding region of these five genes. The systematic study of phenotypes of this set suggest that  
104 none of the main three mechanisms of tolerance is preferentially used over another (Inês *et al.*,  
105 2015). Therefore, studies of different landraces can offer ways to understand individual salt  
106 tolerance mechanisms in the rice plant (Lisa *et al.*, 2004; Yesmin *et al.*, 2014). However, the  
107 mechanism associated with tolerance during the reproductive stage has been barely explored. As  
108 mentioned earlier, high salinity in this stage can alter many traits associated with grain quality  
109 and quantity, eventually decreasing yield significantly. Therefore, it is important to explore the  
110 physiological response of the rice plant at both stages in order to obtain a superior variety from  
111 breeding which can maintain salinity tolerance for both developmental stages.

112

113 The choice of female parents in breeding programs plays a critical role in the performance of  
114 crosses. Plants show evidence for complex nuclear-cytoplasmic interaction that may alter their  
115 phenotypes in both interspecific and intraspecific crosses. However, it still remains unclear to  
116 what extent these two components interact with each other and the role of environment in this  
117 interaction. Gregorio and Senadhira (1993) have studied the genetics of salinity tolerance on  
118 diallelic reciprocal crosses of nine different rice varieties and found significant reciprocal effects  
119 among crosses. The presence of maternal inheritance has also been reported for other abiotic  
120 stresses such as chilling response (Chung *et al.*, 2003) and drought (Iida *et al.*, 2007). Therefore, in  
121 plant breeding programs where the aim is to produce stress tolerant high-yielding varieties, it is  
122 important to consider a specific cytoplasm and its interactions with nuclear donor alleles for  
123 determining the performance of plants under stress.

124

125 Quantitative trait loci (QTL) mapping has been implemented in many studies of rice to explore  
126 the genetic basis of traits involved in salinity stress for seedling stages, including salt  
127 injury/tolerance score, fresh and dry weight of shoot and root, Na<sup>+</sup> and K<sup>+</sup> content of shoot and  
128 root, and chlorophyll content (Cheng *et al.*, 2011; Lin *et al.*, 2004; Ren *et al.*, 2005; Sabouri *et al.*,  
129 2009; Soltani *et al.*, 2016; Thomson *et al.*, 2010; Tian *et al.*, 2011; Wang *et al.*, 2012; Zheng *et al.*, 2015).  
130 However, very few studies have been conducted to understand the genetic basis of reproductive  
131 stage traits that are important for tolerance such as plant height, tiller number, panicle number,  
132 pollen fertility and yield (Hossain *et al.*, 2015; Zang *et al.*, 2008).

133

134 QTL co-localization has been reported for traits that are strongly correlated (Dechaine *et al.*,  
135 2014). Many clustered, putatively pleiotropic QTL have been found that affect various life  
136 history and fitness characters, especially those that are related to yield, in rice, wheat, pea and  
137 rapeseed (Burstin *et al.*, 2007; Quarrie *et al.*, 2006; Shi *et al.*, 2009; Xue *et al.*, 2008). QTLs for two  
138 different traits can have the same/opposite sign of effects for both. If the genes involved help in  
139 coordination during multiple steps of development, then positive selection for one trait may have  
140 an outcome on several traits in the same positive direction, e.g. a pleiotropic same sign QTL for  
141 seed size and protein content in pea (Burstin *et al.*, 2007). Very strong opposite sign of effects for  
142 QTL has also been reported for plants including rice (Dechaine *et al.*, 2014; Xiao *et al.*, 1998) and

143 may represent tradeoffs. For breeding programs where breeders aim for QTL pyramiding for  
144 multiple desired traits, opposite signed QTL for different traits may impose some constraints on  
145 selecting co-localized QTL. Hence, it is beneficial to have a clear understanding about QTL co-  
146 localization and perform careful selection of these genomic loci for pyramiding.

147  
148 In this study we genotyped a reciprocal mapping population between the salt tolerant landrace,  
149 *Horkuch* and a high yielding variety *IR29* by DArTseq technique (Akbari *et al.*, 2006). We  
150 identified 14 QTL for 9 traits for salinity treatments at two different developmental stages of the  
151 rice plant. One important finding of this study was to characterize the role of cytoplasm in a  
152 plant's performance under salinity and implement an analysis incorporating this information to  
153 estimate the effect of a QTL. Furthermore, in this QTL analysis framework, we applied a linear  
154 mixed model to incorporate residual polygenic variation which is a better way to estimate QTL  
155 effect for polygenic traits. In our previous study we applied Double digested Restriction  
156 Associated DNA (ddRAD) technique to construct genetic map of this population where we failed  
157 to map a substantial genetic space (Noor *et al.*, 2019). In this current study, with the aid of an  
158 improved genetic map by DArTseq technique and a robust QTL analysis framework we were  
159 able to identify additional QTLs with higher likelihood and tighter confidence interval. In  
160 addition to that, we identified co-localized QTL within and across two different treatment stages,  
161 which emphasizes the need for conditional selection of QTL in a breeding program in order to  
162 combine survivability at the seedling stage and yield tolerance at reproductive stage. Taken  
163 together, the findings of this study contribute to our understanding of the molecular mechanism  
164 of salt tolerance for *Horkuch* and pave a way to introgress salinity tolerance into a commercial  
165 cultivar that can maintain significant yields under stress.

166

## 167 **Methods**

### 168 **Development of the reciprocally crossed populations**

169

170 The rice cultivar *Horkuch* (IRGC 31804) and *IR29* (IRGC 30412) were acquired from the IRRI  
171 Gene bank. Seeds were sown in a crossing block after breaking dormancy at 50°C for 5 days in  
172 an oven during the wet season of 2011 (June-July) at IRRI, in the Philippines. Two reciprocally  
173 crossed F<sub>1</sub> seeds were generated with *Horkuch* and *IR29* in October, 2011. F<sub>1</sub> plants were

174 initially confirmed by SSR marker (RM493) and both  $F_1$ s were advanced to the  $F_2$  stage by  
175 selfing. Our experimental approach centers on an  $F_{2:3}$  design, whereby genotypes for mapping  
176 are collected from  $F_2$  individuals and phenotypes are obtained from a sampling of their  $F_{2:3}$   
177 progenies (Zhang et al, 2004). Approximately, 1200  $F_2$  from both crosses (600 from each cross)  
178 were advanced to  $F_3$  at BRRI in Bangladesh.  $F_{2:3}$  progenies derived from *Horkuch* × *IR29* are  
179 referred to as *Horkuch*♀ and those from the reciprocal cross as *IR29*♀.

180

### 181 **Physiological screening at the seedling stage**

182

183 We randomly chose 204  $F_{2:3}$  families and screened for salinity stress-induced phenotypic traits at  
184 the seedling stage (137 families from *IR29*♀ and 65 families from *Horkuch*♀ cross were chosen  
185 for this screening). Plants were grown in hydroponic solution with 9 replicate siblings of each of  
186 the 204 families (Yoshida, 1976). Two weeks after germination (four leaf stage), we started salt  
187 stress from 6 dSm<sup>-1</sup> through 12 dSm<sup>-1</sup> salt stress (NaCl) with 2 dSm<sup>-1</sup> increments per day. Then  
188 after 2 weeks of salt stress, plants were scored using the SES approach (Standard Evaluation  
189 System) (IRRI, 2002) which evaluates the leaf damage as well as the overall appearance of  
190 plants. Here, a scale of 1-9 corresponds to ascending salt sensitivity. Physiological parameters  
191 like stomatal conductance, chlorophyll content, potassium and sodium content, shoot and root  
192 relative water content, dry weight, and length of the salt stressed plants were also measured (See  
193 Supplementary Methods).

194

### 195 **Physiological screening at the reproductive stage**

196

197 Reproductive stage screening under salinity stress (NaCl stress at 8 dS/m applied at a time to  
198 water in a bowl with the plants in soil in pots with holes) was performed for a subset of  
199 *Horkuch*♀ and *IR29*♀  $F_{2:3}$  families in soil by following standard IRRI protocols (Gregorio *et al.*,  
200 1997). For reproductive stage screening 140 families were chosen based on a selection of 70  $F_2$   
201 families from each population. Our selection was based on the distribution of SES scores where  
202 the lower tail (more tolerant families) was defined as SES scores from 3 to 5 and the upper tail  
203 (sensitive) was defined as SES scores from 7 to 9. All families that were in the lower or upper  
204 tail were selected along with 70 randomly chosen families from SES score in between 5 and 7.

205 The two  $F_0$  parents were also included in our studies. A few families had poor germination and  
206 were subsequently excluded from the reproductive screening experiment. In the end, 130  
207 families were included in reproductive screening: 61 from *Horkuch*♀ and 69 from *IR29*♀  
208 population. Stress was applied prior to panicle initiation at 30 days and continued until seeds  
209 were mature. Five  $F_3$  siblings from each  $F_2$  individual were considered as replicates while  
210 screening. Samples were randomized using an incomplete block design. Parameters that were  
211 measured at this stage have been listed in Supplementary Methods.

212

### 213 **DNA extraction, genotyping by DArTseq and linkage map construction**

214 Genomic DNA of  $F_2$  individuals and parents was extracted using the CTAB method (Doyle and  
215 Doyle, 1990) from 1g of fresh leaf tissue after freezing in liquid nitrogen and grinding.  
216 Genotyping was done by the DArTseq technique as described by Akbari et al (2006). For the  
217 DArTseq method Nipponbare Genome from Phytozome (v9) was used as reference to determine  
218 the physical position of each DArTseq clone. Analyses for linkage map construction were  
219 completed with qtlTools (Lovell) and R/qtl (Broman *et al.*, 2003) packages. We filtered markers  
220 that had more than 50% missing data and showed significant segregation distortion for chi-  
221 square test (p-value < 0.001) from expected ratio (For a given locus, 1:2:1  $\equiv$  homozygous parent  
222 1 allele: heterozygous: homozygous for parent 2 allele). Similar markers were further removed  
223 and marker order was obtained by the tspOrder function from TSPmap tool (Monroe *et al.*, 2017)  
224 which applies a traveling salesperson problem solver to order markers. Detailed method for  
225 constructing the linkage map is described in our Supplementary Methods. The final linkage map  
226 was estimated by est.map function of R/qtl package with the Kosambi map function. To test for  
227 the occurrence of cytoplasm-nuclear association we performed chi-square test of independence  
228 on allele frequency for each locus grouped by cytoplasm and significant association was  
229 determined by adjusting p-values using FDR method (FDR threshold =0.1).

### 230 **QTL analysis**

231 Genotype probabilities were calculated at a 1 cM step interval using the calc.genoprob function.  
232 QTL mapping was executed using the Haley-Knott regression algorithm (Broman *et al.*, 2003) of  
233 the R/qtl2 (Broman *et al.*, 2019; Lovell)(Broman *et al.*, 2019) package where we fit the LOCO  
234 (Leave One Chromosome Out) model for each trait and included kinship as a covariate. The



235 LOCO model utilizes the kinship matrix to reduce background polygenetic variation except for  
236 the chromosome that is being tested for QTL mapping. We also tested cytoplasm as an additive  
237 and interactive covariate in the QTL model using likelihood ratio tests and retained factors in the  
238 models when significant. To test whether our selection of a test cohort imposed significant  
239 population structure for the reproductive stage treatment we assigned each F<sub>2</sub> family into one of  
240 the following categories: tolerant, intermediate and sensitive. We incorporated selection cohort  
241 as a covariate while building QTL model for traits at reproductive stage. However, we did not  
242 find any significant effect of selection cohort on QTL models and therefore did not include  
243 selection cohort as a covariate for further analysis. Significance thresholds for QTL were  
244 determined for each trait by 1000 permutations ( $\alpha=0.05$ ) and QTL peaks that passed the  
245 threshold were considered for further analysis. Permutations were stratified by cytoplasm for the  
246 QTL models where cytoplasm was considered as a covariate. We also evaluated the normality of  
247 the QTL model residuals and found this assumption has been violated of for trait TK.  
248 Confidence intervals (1.5 LOD drop) for each QTL were calculated using the *lodind* function of  
249 the R/qtl package (Broman *et al.*, 2003) expanding it to a true marker on both sides of the QTL.  
250 Codes for QTL analysis are available in GitHub repository (Haque, 2019).

## 251 **Identification of candidate genes within QTL confidence interval and Gene ontology** 252 **enrichment analysis**

253 In order to identify candidate gene models within a given QTL interval, we integrated the genetic  
254 and physical map based on the marker order of genetic map. We first pulled out the genetic  
255 markers flanking a given QTL confidence interval and their basepair positions to define the  
256 physical interval on the genome for that QTL. Gene models in these physical QTL intervals were  
257 retrieved using the structural gene annotation of the rice Nipponbare reference genome from  
258 Phytozome 9. We used the Gene ontology (GO) annotated for each gene model of this reference  
259 (Phytozome 9) for GO enrichment analysis. We then tested for the enrichment of GO terms for  
260 each QTL interval using the classical Fisher's exact test available in the topGO (Alexa and  
261 Rahnenfuhrer, 2019) package in R.

## 262 **RESULTS**

### 263 **Phenotypic traits vary between cross direction in both developmental stages:**

264 We used a bi-directional  $F_2:3$  experimental design to examine the effect of salinity on various  
265 growth, yield and physiological parameters of rice as well as the role of cytoplasm on these  
266 traits. Rice is most susceptible to salinity during seedling and reproductive growth stages.  
267 Therefore, we focused on phenotypes at these two stages that can potentially mediate stress  
268 during salinity treatment. For the seedling stage, we scored traits that were related to survival,  
269 photosynthesis and mineral elements in leaves including Standard Evaluation Score (SES), Total  
270 Chlorophyll Content (Tchl<sub>r</sub>), Shoot Length (SL), Root length (RL), Total Sodium (TNa), Total  
271 Potassium (TK) and Potassium by Sodium (K/Na). For the reproductive stage treatment, we  
272 focused on yield-related parameters including Panicle Exsertion (PE), Total Tiller Number (TT),  
273 Effective Tiller Number (ET), Filled Grain Weight (FGW), Filled Grain Number (FGN) and  
274 Spikelet Fertility (SF).

275 We found striking difference between the two parents for many of our measured traits across  
276 both stages of salt treatment (Table 1). As reported in previous studies, we have found that  
277 *Horkuch* is more tolerant to salinity (measured by SES score) compared to *IR29* which is highly  
278 sensitive for salt at the seedling stage (p-value < 0.01). For reproductive stage salinity treatment,  
279 these two parents show significantly different responses for ET, SF, FGW, DF and HI where the  
280 *Horkuch* parent had higher number of ET and also higher SF, FGW and HI.

281 It has been reported that complex cytoplasm-nuclear interaction can alter plant phenotypes  
282 (Joseph *et al.*, 2013a). Therefore, we aimed to test whether cytoplasm has a role on the  
283 performance of this mapping population under salinity stress. We found many traits were  
284 significantly different as a result of cytoplasmic background (Table 1). Tchl<sub>r</sub>, TNa, TK and K/Na  
285 were found to differ significantly among the *Horkuch* and *IR29* cytoplasm at the seedling stage  
286 treatment. For reproductive stage treatment PE, TT, ET, FGN were found to differ significantly  
287 among the two parental cytoplasm. This observation indicates that cytoplasm can explain a  
288 significant amount of variation in the population.

289 The generation of extreme phenotypes in a crossing population, or transgressive segregation, has  
290 been reported in many plants which may be due to the effect of complementary genes, over-  
291 dominance or epistasis (Rieseberg *et al.*, 1999). Here, we further investigated the role of cytoplasm  
292 on the transgressive segregation of these traits. In this experiment we found that SES, SRWC,  
293 TChl<sub>r</sub>, TK, FGN, FGW clearly segregate transgressively (Table 1). Interestingly, TK, TChl<sub>r</sub>,

294 FGN and FGW showed significant differences in the two reciprocal crosses with respect to the  
295 segregation pattern. The distribution of TK showed a strong bimodal pattern with very little  
296 overlap of distribution between cytoplasmic backgrounds (Figure 1). This observation is  
297 indicative of an important role of cytoplasm on transgressive segregation for this population.

298 To understand the partitioning of genetic variation we used principal component analysis of 130  
299 families which had complete observations of all traits for both the stages of treatment. The first  
300 two PC axes comprise the majority of genetic trait variation in this population (31.3%) (Figure  
301 2). This indicated substantial genetic correlation among these traits in this population.  
302 Interestingly, principal component one separates individuals into two groups almost exclusively  
303 depending on their respective cytoplasm. This observation further supports a significant role of  
304 cytoplasm on the performance of a plant under different treatment stages. We also found  
305 moderate correlation of some traits between two different stages of treatment: PH showed  
306 positive correlation with SL and yield related traits such as FGN, FGW, SF, HI and PE are  
307 negatively correlated with TK (Figure 2). This correlation suggests some possible shared  
308 mechanisms of salinity responses that has some trade-off between two different treatment stages.

### 309 **Linkage map construction**

310 In our previous study we constructed a linkage map for this reciprocal mapping population by  
311 applying ddRAD technique. Unfortunately, we had high genotyping error and inflated  
312 segregation distortion for the two parental alleles for a given locus. Therefore, we failed to  
313 capture the genome-wide linkage map which resulted in the removal of the entire chromosome 5  
314 for QTL mapping. In this study, we genotyped this reciprocal mapping population using  
315 DArTSeq (Diversity Array Technology coupled with Sequencing) technique in order to improve  
316 genotyping error by adding higher sequence coverage. DArTSeq can generate low to moderate  
317 density SNP information with high coverage and low cost. This method uses restriction enzymes  
318 to reduce the complexity of the genome and has been optimized for various plant species to  
319 achieve best complexity reduction. We used this platform for our mapping population to generate  
320 genotype information at ~10 thousand loci that are well-distributed in the rice genome. For  
321 analyses, we filtered all the DArTseq SNP loci to obtain polymorphic homozygous SNPs for the  
322 parents and retained only loci that had minimum 50% representation in the population. With  
323 these filter criteria we obtained 2,230 high quality SNPs for this mapping population. Among

324 these loci, 956 markers that showed significant segregation distortion by chi-square test [P value  
325  $< 1e-2$ ] were removed. More distorted loci were skewed towards the *Horkuch* parent than the  
326 *IR29* parent. 739 markers that were similar were dropped using a minimum recombination  
327 fraction threshold of 0.03. Markers were reordered by the *concorde* program as determined by  
328 the *tspOrder* function (Monroe *et al.*, 2017). The final map was constructed by “*kosambi*” map  
329 function after dropping 36 markers which had very different orders between their genetic map  
330 and physical position in genome. The final map had 499 markers with a map size of 2004.8 cM  
331 and average distance between markers of 4.1 cM (Supplementary Figure 1A). The maximum gap  
332 of 22.3 cM was found in chromosome 5. Chromosome 7 had the fewest markers (22 markers).  
333 Supplementary Figure 1B presents the concordance of genetic map with the physical map of rice  
334 genome. As mentioned in earlier, we detected significant association of cytoplasm for multiple  
335 traits in both stages of treatment therefore we aimed to test (Chi-square test of independence, see  
336 Method section) for cytoplasm-nuclear association for each marker in this genetic map. We  
337 detected 10 loci that showed significant cytoplasm-nuclear association [FDR  $< 0.1$ ] and these are  
338 mostly clustered in chromosomes 2, 3 and 7. This association suggested the presence of  
339 cytoplasm-nuclear linkage disequilibrium in this mapping population resulting from selection at  
340 the reproductive stage during the development of the mapping population. Overall, we  
341 constructed a linkage map with moderate marker density that was closely aligned with the  
342 physical map of rice genome.

### 343 **Significant QTL at both growth stages**

#### 344 **QTL for seedling stage treatment**

345 We measured eight traits that reflect the survival performance of rice seedlings under salinity  
346 stress. We found six QTL for three traits: SL, RL and TK (Table 2, Figure 3). We found three  
347 significant QTL for SL occurring at qSL.1@183 (reporting a QTL for SL located at chromosome  
348 1 at 183 cM), qSL.3@218, and qSL.5@160. For these QTL, the positive alleles were from  
349 *Horkuch* parent and we detected no significant cytoplasmic effects or interactions. The QTL at  
350 qSL.1@183 had a large effect corresponding to a ~3.5 cm increase in seedling length and was  
351 localized to 3.5 Mbp at the end of chromosome 1 (~38.4 Mbp). The second QTL, qSL.5@160,  
352 had a small confidence interval of ~ 1 Mbp but the effect size was moderate. The third QTL at  
353 qSL.5@160 had a very larger confidence interval (~ 9 Mbp) with small effect size.

354 We identified one large effect QTL for RL at qRL.2@167 with a confidence interval of ~ 4 Mb.  
355 Here, the *Horkuch* parent contributed the positive allele. For TK, cytoplasm was a significant  
356 covariate that interacted with two QTL that were detected at qTK.2@45 and qTK.3@203. In  
357 addition, the QTL qTK.2@45 is co-localized with the cluster of genetic loci that showed  
358 significant cytoplasm-nuclear association. The other QTL for TK, qTK.3@204 did not overlap  
359 with the association cluster in chromosome 3 but resided in close proximity. This evidence  
360 suggests a possible role of cytoplasmic-nuclear interaction for this trait.

### 361 **QTL for reproductive stage treatment**

362 Very little work has been published on salinity stress during rice reproductive stages. For this  
363 stage, our primary focus was on yield responses of the plants under salt stress. We found 8 QTL  
364 for 6 traits at reproductive stage salinity treatment (Table 2, Figure 3). A major effect QTL for  
365 FGN was found on Chromosome 10 at 58.5 cM (qFGN.10@58.5). Here, the *IR29* parent  
366 contributed the positive allele. We found significant cytoplasm-nuclear interaction for QTL  
367 model where the *IR29* allele had positive effects only for *IR29*♀ (Figure 4). However, this QTL  
368 had a very wide confidence interval of ~6 Mbp. We found two co-localized QTL in this same  
369 region including a QTL for FGW and another for SF at qFGW.10@58.5 and qSF.10@59  
370 respectively. These two QTL also had significant interactions with cytoplasm in their  
371 corresponding QTL models. *IR29* contributed the positive allele for both qFGN.10@58.5 and  
372 qFGW.10@58.5. For FGW, as like FGN, the *IR29* allele had a positive effect only for *IR29*♀ but  
373 for SF this allele not only had positive effect for *IR29*♀ but also had a negative effect for  
374 *Horkuch*♀. We also found a QTL for HI at qHI.10@104 for which the positive allele was from  
375 *IR29*. However, this model only had an additive effect of cytoplasm.

376 Another QTL, qET.7@97 cM was detected for ET where the *Horkuch* parent contributed the  
377 positive allele. Similar with the other grain related traits, cytoplasm contributed significantly to  
378 this QTL model. However, the positive allele from *Horkuch* performed better in *IR29*♀. We also  
379 found three PH QTL occurring at qPH.1@215, qPH.3@211 and qPH.5@144, for which the  
380 positive alleles were from the *Horkuch* parent. The first two QTL models showed only additive  
381 contribution of cytoplasm but the third showed also an interactive effect of cytoplasm. Overall,  
382 we found a hotspot of QTL on chromosome 10 for multiple parameters related to yield. The  
383 significant correlation of these traits may reflect related metrics of yield performance in rice.

## 384 **QTL co-localization**

385 In this study, we found that some QTL intervals of various traits overlapped, therefore we  
386 annotated these overlapping intervals as QTL clusters. We detected a co-localized QTL at  
387 1@175:220 cM [QTL Cluster 1 (QC 1)] affecting PH and SL from two different stages of  
388 treatment. These traits represent the vigor of plants at the two different growth stages and had  
389 significant positive correlation (Pearson correlation coefficient = 0.54). In parallel with this co-  
390 relation, these two QTL had positive alleles from the *Horkuch* parent which indicate the same  
391 sign of effects for these QTL. Another wide co-localized cluster was found at 3@194:273 cM  
392 [QTL Cluster 2 (QC 2)] impacting SL, PH and TK with the positive allele from the *Horkuch*  
393 parent. However, TK showed no significant correlation with PH which was causal for the co-  
394 localization for QC1. A third QTL Cluster 3 (QC 3) was found at 5@144:170 for SL and PH  
395 where the positive alleles were from *Horkuch* parent. The fourth QTL Cluster (QC 4) at  
396 10@58:107 was found for four yield related traits including FGN, FGW, SF and HI for which the  
397 positive alleles were from the *IR29* parent.

## 398 **GO enrichment analysis of candidate genes within QTL confidence intervals**

399 To understand the molecular mechanism of salt tolerance, we further investigated the function of  
400 candidate genes that were located within the QTL confidence intervals (Supplementary File  
401 1). We applied GO enrichment analysis on the candidate gene lists against the genome-wide  
402 background frequency of GOs. The results for GO enrichment analysis have been provided in  
403 Supplementary File 2. For the seedling stage, QTL at qSL.1@183 showed significant enrichment  
404 of GO terms such as pollination, protein lipidation, lipoprotein and liposaccharide metabolic  
405 process, various transport and DNA-directed RNA polymerase complexes. Another QTL for SL  
406 at qSL.3@218 was significantly enriched with the GO terms protein transport and localization,  
407 amide and lipid transport, cytoskeleton and actin binding. The third QTL for SL, qSL.5@160  
408 had significant enriched GO terms for chromatin assembly, nucleosome organization, DNA  
409 packaging, ion transport, amide and peptide transport. QTL qRL.2@167 showed significant  
410 enrichment of GO terms such as carboxylic, dicarboxylic and C4-dicarboxylate transport, malate  
411 transport, anion transport and sexual reproduction. Two QTL for TK, qTK2@45 and  
412 qTK3@204, were both enriched with the GO terms oxidoreductase activity, various

413 transmembrane transporter activity, potassium ion transmembrane transporter and cation  
414 transmembrane transporter.

415 For traits at reproductive stage, the QTL qPH.1@215 was significantly enriched with the GO  
416 terms anion and potassium ion transmembrane transport, divalent metal ion transport,  
417 pollination, reproduction process, endoplasmic reticulum and organelle sub-compartment.  
418 Another PH QTL, qPH.3@211 showed enrichment for GO terms such as cellular nitrogen  
419 compound metabolism, organic acid transport, mitochondrial membrane and protein complex.  
420 The third QTL, qPH.5@144 also showed significant enrichment for nitrogen compound  
421 metabolic process. This QTL was also enriched for various mitochondria and cytoplasm related  
422 GO terms. The QTL, qET.7@97 was enriched with cytoplasm and mitochondrial membrane part  
423 and chlorophyll metabolic process. QTL for FGW, FGN, SF and HI share the same QTL  
424 intervals therefore the gene models within this interval were identical. This interval was enriched  
425 with cell wall macromolecule catabolic process, amino sugar and glycan metabolic process,  
426 protein localization to organelles and mitochondrial transport. The significant enrichment of  
427 mitochondrial and organelle related GO terms for some QTL confidence intervals suggests a  
428 possible explanation for the significant cytoplasm and cytoplasmic-nuclear interactions detected  
429 in our study.

### 430 **GO enrichment analysis of differentially expressed genes of this mapping population**

431 In our previous gene expression studies (Razzaque *et al.*, 2019; Razzaque *et al.*, 2017), we  
432 investigated the association of gene expression differences with salt stress on this reciprocal  
433 mapping population for both seedling and reproductive stage salinity treatment. To understand  
434 the molecular mechanism of cytoplasm-treatment interaction, we further tested for GO  
435 enrichment of genes that showed significant cytoplasm\*treatment in our previous studies  
436 (Supplementary File 3). From our seedling stage salinity treatment study, the expression profile  
437 of the reciprocal mapping population for shoot and root tissues for 24 hours and 72 hours after  
438 salt treatment was available. Differentially expressed genes (DEGs) for cytoplasm\*treatment  
439 were significantly enriched with processes such as chromatin assembly, amide biosynthesis,  
440 various cation transports, photosynthesis, cellular response to stress and energy coupled proton  
441 transport. Cellular components were enriched with GO terms involved in various organelles,  
442 mitochondrial matrix and photosystems. GO terms such as sodium ion transmembrane activity

443 and various sodium symporters were enriched for molecular function. DEGs for root tissues were  
444 enriched with biological processes such as response to oxidative stress and transports of malate,  
445 dicarboxylic acid and copper ion. The only significant enriched GO term for the cellular  
446 component was for extracellular activity. For molecular functions, DEGs were enriched with GO  
447 terms such as oxidoreductase, hydrolase activity and voltage gated potassium channel activity.

448 For the reproductive stage of salinity treatment, the expression profile of shoot and root tissues at  
449 72 hours after salinity treatment was available. The number of DEGs that showed significant  
450 interaction between cytoplasm and treatment was very low (5 significant DEGs) for root tissue  
451 therefore we only tested enrichment for DEGs in shoot tissue. DEGs for shoot tissues for  
452 reproductive stage were enriched with biological processes such as different lipid metabolic  
453 processes, tRNA processing and various ion transporters. Similar to shoot DEGs at seedling  
454 stage, significant enriched GO terms for the cellular component were involved with  
455 mitochondria and organelles. For molecular function, significant enriched GO terms showed  
456 phosphatase and oxidoreductase activity, sodium ion transporter activity and various sodium  
457 symporter activity including organic acid:sodium symporter, bile acid:sodium symporter activity.  
458 These were also enriched for DEGs for the seedling stage shoot tissue. Many of these symporters  
459 are located in the mitochondrial membrane or organelle lumen. This is one of the reasons why  
460 we had many significantly enriched GO terms for the cellular component of mitochondria.

461 For QTL models that had significant cytoplasmic effect, 1473 annotated genes are present in the  
462 respective confidence intervals. Among the genes that are present in the QTL confidence  
463 interval, 188 showed significant cytoplasm\*treatment interaction in our previous expression  
464 studies (Supplementary File 4). In order to identify their association for cellular component we  
465 further tested for enrichment of GOs for the same. We found these genes to be significantly  
466 enriched with GO terms such as mitochondrial proton-transporting ATP-synthesis complex,  
467 mitochondrial protein-complex and mitochondrial membrane.

468

## 469 **DISCUSSION**

470 In this study, we explored the responses of rice to salinity stress at two different growth stages  
471 with a reciprocal mapping population. Among the 14 QTL that we reported, 8 QTL models



472 showed significant effect of cytoplasm. This finding underlines the importance of considering  
473 both organelle and nuclear genome for complex traits such as salinity tolerance.

474 Cytoplasmic background may play an important role in trait genetic architecture by itself or  
475 through complex interactions with the nuclear genome. (Joseph *et al.*, 2013b; Lovell *et al.*, 2015;  
476 Moison *et al.*, 2010; Tang *et al.*, 2013). Gregorio and Senadhira (1993) reported significant  
477 reciprocal effects among crosses for salinity response in their study of nine different rice  
478 varieties and suggested using susceptible plants as male parent for hybridization programs. In  
479 order to identify the best candidates for QTL pyramiding by breeders, it is essential to estimate  
480 single QTL effect for the trait of interest. Hence, it is important to test for the random effect of  
481 covariates such as cytoplasm in a QTL model and estimate its size. In this way, the causality,  
482 contribution and combinations of cytoplasm and nuclear-donor alleles of QTL can be defined.  
483 Moreover, including cytoplasm as covariate in QTL mapping, can increase the ability to detect  
484 unrelated QTL peaks. Considering all these aspects, in this study we employed a QTL modeling  
485 framework where the cytoplasm-nuclear interaction was also considered as a contributor to  
486 phenotypic variance. For TK, FGN, FGW the additive effect of cytoplasm was significantly large  
487 compared to the effect of a single QTL (Figure 4). Overall, we found significant contribution of  
488 cytoplasm for traits related to yield, such as FGN, FGW and SF as well as one important trait for  
489 the seedling stage TK. Identification of causal impacts of cytoplasm will help to define the best  
490 combination of cytoplasm and nuclear-donor materials and will underscore the selection trade-  
491 off for multiple desired traits. For instance, on the one hand, we found the positive nuclear allele  
492 of *IR29* had its effect only in *IR29*♀ for the QTL model of yield related traits; while on the other  
493 hand we had the strong positive effect of *Horkuch* cytoplasm for the QTL model of TK at  
494 seedling stage treatment. The latter trait is a highly desired one for breeding salt tolerant  
495 varieties. Hence, estimating the contributions of cytoplasm for multiple traits can help  
496 understand the performance trade-off in breeding program for QTL pyramiding.

497 Cytoplasmic genome can influence the interaction of alleles from nucleus and cytoplasm and can  
498 favor the evolutionary co-adaptation of high-fitness. In the current study we found a significant  
499 association of cytoplasm for some traits and therefore further tested for non-random interaction  
500 of alleles for nucleus and cytoplasm. We found that the QTL qTK.2@45 was a hotspot of  
501 cytoplasm-nuclear interaction on chromosome 2. Similarly, qPH.3@211 was another similar

502 hotspot on chromosome 3. Both of these QTL models showed significant effect for cytoplasm.  
503 For qTK2@45, the effect of cytoplasm was mostly additive where *Horkuch*♀ contributed large  
504 positive effect. On the contrary, for qPH3@211, cytoplasm had an interactive effect. *Horkuch*  
505 nuclear allele had a positive effect on PH but the effect was even higher for *IR29*♀  
506 (Supplementary Figure 3). Taken together, this suggests a significant interaction of nuclear  
507 alleles with the cytoplasmic genome. This further supports the fact that selection of female plant  
508 plays an important role for the performance of a breeding population and while pyramiding QTL,  
509 the conditional selection of cytoplasm may have some trade-off on a hybrid plant's performance.  
510 We detected significant cytoplasm-nuclear linkage of a few markers that overlapped with some  
511 QTL intervals. Therefore, careful consideration is needed in order to select these loci for QTL  
512 pyramiding.

513 One important finding in this study is that we have detected multiple co-localized QTL within  
514 and among the two different stages of salinity treatment. This finding emphasizes the possible  
515 constraints during selection of QTL in a breeding program. Here we identified four QTL clusters  
516 where multiple trait QTL co-localized. Co-localized QTL can impose constraints on selection for  
517 QTL pyramiding. As an example, we found that QTL cluster 1 had a positive effect for the  
518 *Horkuch* parental allele for PH and SL. However, a taller plant is not the desired plant  
519 architecture for a breeding program for high-yielding rice varieties since this will lead to over-  
520 investment of energy in vegetative growth and potential lodging. On the other hand, Leon et al.  
521 (2015) reported that percent of shoot length reduction under saline treatment is highly co-related  
522 to saline sensitivity. This conditional relationship between traits results in some possible trade-  
523 offs between favorable and undesirable traits. The same logic is applicable for QTL cluster 2  
524 where traits (SL, TK and PH) for these clusters are positively correlated but increased PH is not  
525 desirable for any breeding program. On the other hand, for QTL cluster 4, all the yield related  
526 such as FGN, FGW, SF and HI could be combined where the *IR29* parent contributes all the  
527 positive alleles. This finding underscores the importance of studying the performance of a plant  
528 for different developmental stage. In addition to that, we need to consider the fact that selection  
529 on multiple traits may not be orthogonal due to the complex mechanisms of salt adaptation.

530 To understand the molecular mechanism of salt response and the effect of cytoplasm for salt  
531 tolerance we tested for enrichment of GO functions for genes within QTL confidence intervals.

532 Both the QTL intervals for TK were enriched with various transmembrane transporter activity,  
533 and potassium ion transmembrane transporter.  $K^+$  is involved in numerous metabolic process in  
534 plants and excess  $Na^+$  interferes with the  $K^+$  homeostasis during salinity stress. To maintain the  
535 cellular homeostasis of  $K^+$  various potassium transmembrane transporters have been reported  
536 that showed increase salt tolerance in various glycophytes (Tester and Davenport, 2003). For the  
537 reproductive stage, we found most of the QTL intervals for PH, ET, FGW, FGN, SF and HI were  
538 enriched with mitochondria, cytoplasm and organelle related GOs. This supported the  
539 observation that these QTL models also showed significant interaction with cytoplasm. Thus a  
540 possible interaction of the cytoplasm genome with nuclear alleles present in the region of QTL  
541 confidence intervals is likely. Additionally, enrichment analysis of DEGs (significant for  
542 cytoplasm\*treatment model) from our previous studies (Razzaque *et al.*, 2019; Razzaque *et al.*,  
543 2017) on this mapping population were enriched with GO terms such as organelle, thylakoid,  
544 mitochondria, photosynthesis, cation transmembrane transporter and various sodium symporter  
545 activities. Salt stress inhibits photosynthesis of plants but how this affects the ionic balance of  
546 chloroplasts has not been studied much until recently. Bose *et al.* (2017) has proposed some  
547 candidate transporters that are involved for the movement of sodium, potassium and chloride  
548 across chloroplast membrane in glycophytes and halophytes and explained how these  
549 transporters may regulate photosynthesis in chloroplast. These candidate symporters include bile  
550 acid: sodium symporter and cation transmembrane transporter which have possible role in  
551 maintaining chloroplast ion homeostasis. From our gene expression studies of  
552 cytoplasm\*treatment DEGs, enrichment of symporter GOs that are localized in mitochondria and  
553 organelles suggest a possible role of mitochondria and chloroplast during salinity stress and  
554 tolerance or sensitivity to it. This evidence also suggests a plausible explanation why we found  
555 cytoplasm as a covariate in QTL models for this study. These are likely candidates for future  
556 functional genomic studies of salinity tolerance in rice.

557 In this QTL analysis framework, we applied linear mixed model which can handle cytoplasm  
558 and alleles as fixed effect predictors. This model can also consider residual polygenic variation  
559 as random effect using a kinship matrix. Here we implemented DArtSeq technique which can  
560 genotype a moderate number of SNPs that are well-dispersed in rice genome and aimed to select  
561 SNPs close to gene space of the rice genome. In our previous study, we had generated a genetic  
562 map on this mapping population by ddRAD technique which failed to capture a significant space

563 of genetic map due to erroneous genotyping and high rate of missing SNP calls (Noor *et al.*,  
564 2019). In this current study, we implemented a robust QTL analysis framework on this improved  
565 genetic map and we were able to detect three QTLs for SL and one RL at seedling stage salinity  
566 treatment which we could not detect in our earlier study (Supplementary Table 1). For  
567 reproductive stage salinity treatment, we were able to detect additional five QTL for PH, ET and  
568 SF. We have also detected one big effect QTL for FGN and FGW in a different chromosome in  
569 this current study due to the fact that in our previous study we failed to capture markers at that  
570 region. In addition to that, this framework provided QTL with higher likelihood and tighter  
571 confidence interval and provided better estimation of effect size of each QTL for a given trait.  
572 Therefore, this additional detected QTL with high LOD scores and tighter confidence intervals  
573 may contribute significantly for the improvement of salt tolerant high yielding rice variety  
574 development.

575

## 576 **CONCLUSION**

577 In this study, we aimed to identify genetic loci for salinity tolerance of a rice landrace, *Horkuch*,  
578 at two sensitive developmental stages. We found 14 QTL for 9 traits under salinity treatment.  
579 We detected some overlap in the genomic regions affecting traits across developmental stages.  
580 One chief finding of this study was the significant contribution of cytoplasm on many traits and  
581 eventually the effect on their corresponding QTL model. Enrichment analyses suggest that the  
582 observed cytoplasmic effect could be causally related to plastid symporter activity and their  
583 interaction with nuclear genes. Collectively, this study helped to understand the genetic basis of  
584 salt tolerant mechanism of a local rice landrace *Horkuch*. Moreover, careful implementation of  
585 pyramiding of QTLs that were detected in this study can pave a way to generate high yielding  
586 salt tolerant rice varieties.

## 587 **SUPPLEMENTARY DATA**

588 **Supplementary\_Material:** Detailed supplementary methods, tables and figures

589 **Supplementary\_File\_1:** List of genes in QTL confidence interval where one sheet represents  
590 one single QTL

591 **Supplementary\_File\_2:** List of significant GO terms for genes in QTL confidence interval  
592 where one sheet represents one single QTL

593 **Supplementary\_File\_3:** List of significant GO terms of significant DEGs for  
594 cytoplasm\*treatment interaction model of seedling shoot tissue, seedling root tissue and  
595 reproductive shoot tissue

596 **Supplementary\_File\_4:** List of significant GO terms for the common genes between all  
597 candidate genes of QTL confidence interval and significant DEGs for cytoplasm\*treatment  
598 interaction model of seedling shoot tissue, seedling root tissue and reproductive shoot tissue

## 599 **CONTRIBUTIONS**

600 Z.I.S. and S.M.E. designed the experiment. M.S.R. did reciprocal crossing. S.M.E., S.R., S.F. K.,  
601 S.B. and G.M.N.A.J grew plant and collected phenotypes. S.M.E. and S.R. isolated DNA for  
602 DArTseq. T.H and S.M.E did genotype calling from raw data. T. H. did the modeling for QTL  
603 and other statistical analysis. T.E.J provided his feedback for statistical analysis. T.H. wrote the  
604 manuscript. T.E.J. and Z.I.S. provided their significant feedbacks for writing. S.M.E. and S.R.  
605 revised the manuscript.

## 606 **ACKNOWLEDGEMENT**

607 We thanks to Nazrul Islam and other technicians at BRRRI and Dhaka University who took care  
608 for the plant materials. We would like to thank the members of the Plant Biotechnology Lab and  
609 Juenger Lab who provided their feedbacks on this research project. This work was supported by  
610 the PEER science grant to Z.I.S. by the National Science Foundation (Project 2-004) and USAID  
611 (agreement number AID-OAA-A-11-00012). The grant was hosted by an existing NSF grant  
612 from the Plant Genome Research Program (IOS-0922457) to T.E.J. S.M.E. was supported  
613 through a PhD fellowship grant from Monsanto's Beachell-Borlaug International Scholars  
614 Program (MBBISP). We would like to thank Dr. Harkamal Walia for supervising S.M.E for her  
615 MBBISP. We are thankful to Dr. Adam Price for recommending us DArTseq for genotyping and  
616 also supervising S.F.K. for her Split Commonwealth Fellowship. We would also like to thank  
617 Dr. Abdelbagi M. Ismail to allow us to use IRRRI facilities for raising reciprocal population.

## 618 **REFERENCES**

- 619 **Abdullah Z, Khan MA, Flowers TJ.** 2001. Causes of Sterility in Seed Set of Rice under  
620 Salinity Stress. *Journal of Agronomy and Crop Science* **187**, 25-32.
- 621 **Akbar M, Yabuno T, Nakao S.** 1972. Breeding for Saline-resistant Varieties of Rice : I.  
622 Variability for Salt Tolerance among Some Rice Varieties. *Japanese Journal of Breeding* **22**,  
623 277-284.
- 624 **Akbari M, Wenzl P, Caig V, Carling J, Xia L, Yang S, Uszynski G, Mohler V, Lehmensiek**  
625 **A, Kuchel H, Hayden MJ, Howes N, Sharp P, Vaughan P, Rathmell B, Huttner E, Kilian A.**  
626 2006. Diversity arrays technology (DART) for high-throughput profiling of the hexaploid wheat  
627 genome. *Theoretical and Applied Genetics* **113**, 1409-1420.
- 628 **Alexa A, Rahnenfuhrer J.** 2019. topGO: Enrichment Analysis for Gene Ontology.
- 629 **Amin USM, Biswas S, Elias SM, Razzaque S, Haque T, Malo R, Seraj ZI.** 2016. Enhanced  
630 Salt Tolerance Conferred by the Complete 2.3 kb cDNA of the Rice Vacuolar Na<sup>+</sup>/H<sup>+</sup>  
631 Antiporter Gene Compared to 1.9 kb Coding Region with 5' UTR in Transgenic Lines of Rice.  
632 *Frontiers in Plant Science* **7**.
- 633 **Bose J, Munns R, Shabala S, Gilliam M, Pogson B, Tyerman SD.** 2017. Chloroplast  
634 function and ion regulation in plants growing on saline soils: lessons from halophytes. *Journal of*  
635 *Experimental Botany* **68**, 3129-3143.
- 636 **Broman KW, Gatti DM, Simecek P, Furlotte NA, Prins P, Sen S, Yandell BS, Churchill**  
637 **GA.** 2019. R/qtl2: Software for Mapping Quantitative Trait Loci with High-Dimensional Data  
638 and Multiparent Populations. *Genetics* **211**, 495-502.
- 639 **Broman KW, Wu H, Sen S, Churchill GA.** 2003. R/qtl: QTL mapping in experimental crosses.  
640 *Bioinformatics* **19**, 889-890.
- 641 **Burstin J, Marget P, Huart M, Moessner A, Mangin B, Duchene C, Desprez B, Munier-**  
642 **Jolain N, Duc G.** 2007. Developmental Genes Have Pleiotropic Effects on Plant Morphology  
643 and Source Capacity, Eventually Impacting on Seed Protein Content and Productivity in Pea.  
644 *Plant Physiology* **144**, 768-781.
- 645 **Cheng L, Wang Y, Meng L, Hu X, Cui Y, Sun Y, Zhu L, Ali J, Xu J, Li Z.** 2011.  
646 Identification of salt-tolerant QTLs with strong genetic background effect using two sets of  
647 reciprocal introgression lines in rice. *Genome* **55**, 45-55.
- 648 **Dasgupta S, Hossain MM, Huq M, Wheeler D.** 2014. Climate Change, Soil Salinity, and the  
649 Economics of High-Yield Rice Production in Coastal Bangladesh. Policy Research working  
650 paper no. **WPS 7140**.
- 651 **De Leon TB, Linscombe S, Gregorio G, Subudhi PK.** 2015. Genetic variation in Southern  
652 USA rice genotypes for seedling salinity tolerance. *Frontiers in Plant Science* **6**, 374.
- 653 **Dechaine JM, Brock MT, Weinig C.** 2014. QTL architecture of reproductive fitness characters  
654 in *Brassica rapa*. *BMC Plant Biology* **14**, 1-12.
- 655 **Doyle JJ, Doyle JL.** 1990. Isolation of plant DNA from fresh tissue. *Focus* **12**, 13-15.
- 656 **García Morales S, Trejo-Téllez LI, Gómez Merino FC, Caldana C, Espinosa-Victoria D,**  
657 **Herrera Cabrera BE.** 2012. Growth, photosynthetic activity, and potassium and sodium  
658 concentration in rice plants under salt stress. *Acta Scientiarum. Agronomy* **34**, 317-324.
- 659 **Gregorio GB, Senadhira D.** 1993. Genetic analysis of salinity tolerance in rice (*Oryza sativa*  
660 *L.*). *Theoretical and Applied Genetics* **86**, 333-338.
- 661 **Gregorio GB, Senadhira D, Mendoza RD.** 1997. Screening rice for salinity tolerance.  
662 International Rice Research Institute discussion paper series.
- 663 **Haque SA.** 2006. Salinity Problems and Crop Production in Coastal Regions of Bangladesh.  
664 *Pakistan Journal of Botany* **38**, 1359-1365.

- 665 **Haque T.** 2019.
- 666 **Heenan D, Lewin L, McCaffery D.** 1988. Salinity tolerance in rice varieties at different growth  
667 stages. *Australian Journal of Experimental Agriculture* **28**, 343-349.
- 668 **Hossain H, Rahman MA, Alam MS, Singh RK.** 2015. Mapping of Quantitative Trait Loci  
669 Associated with Reproductive-Stage Salt Tolerance in Rice. *Journal of Agronomy and Crop  
670 Science* **201**, 17-31.
- 671 **Iida S, Yamada A, Amano M, Ishii J, Kadono Y, Kosuge K.** 2007. Inherited maternal effects  
672 on the drought tolerance of a natural hybrid aquatic plant, *Potamogeton anguillanus*. *Journal of  
673 Plant Research* **120**, 473-481.
- 674 **Inês PS, Sónia N, Margarida OM, D. PM.** 2015. Comprehensive phenotypic analysis of rice  
675 (*Oryza sativa*) response to salinity stress. *Physiologia Plantarum* **155**, 43-54.
- 676 **IRRI.** 2002. Standard evaluation system for rice.
- 677 **Joseph B, Corwin JA, Li B, Atwell S, Kliebenstein DJ.** 2013a. Cytoplasmic genetic variation  
678 and extensive cytonuclear interactions influence natural variation in the metabolome. *eLife* **2**,  
679 e00776.
- 680 **Joseph B, Corwin JA, Züst T, Li B, Irvani M, Schaepman-Strub G, Turnbull LA,  
681 Kliebenstein DJ.** 2013b. Hierarchical Nuclear and Cytoplasmic Genetic Architectures for Plant  
682 Growth and Defense within *Arabidopsis*. *The Plant Cell* **25**, 1929-1945.
- 683 **Kavitha PG, Miller AJ, Mathew MK, Maathuis FJM.** 2012. Rice cultivars with differing salt  
684 tolerance contain similar cation channels in their root cells. *Journal of Experimental Botany* **63**,  
685 3289-3296.
- 686 **Lin HX, Zhu MZ, Yano M, Gao JP, Liang ZW, Su WA, Hu XH, Ren ZH, Chao DY.** 2004.  
687 QTLs for Na<sup>+</sup> and K<sup>+</sup> uptake of the shoots and roots controlling rice salt tolerance. *Theoretical  
688 and Applied Genetics* **108**, 253-260.
- 689 **Lisa LA, Seraj ZI, Fazle Elahi CM, Das KC, Biswas K, Islam MR, Salam MA, Gomosta  
690 AR.** 2004. Genetic variation in microsatellite DNA, physiology and morphology of coastal saline  
691 rice (*Oryza sativa* L.) landraces of Bangladesh. *Plant and Soil* **263**, 213-228.
- 692 **Lovell JT.** qtlTools.
- 693 **Lovell JT, Mullen JL, Lowry DB, Awole K, Richards JH, Sen S, Verslues PE, Juenger TE,  
694 McKay JK.** 2015. Exploiting Differential Gene Expression and Epistasis to Discover Candidate  
695 Genes for Drought-Associated QTLs in *Arabidopsis thaliana*. *The Plant Cell* **27**, 969-983.
- 696 **Lutts S, Kinet JM, Bouharmont J.** 1995. Changes in plant response to NaCl during  
697 development of rice (*Oryza sativa* L.) varieties differing in salinity resistance. *Journal of  
698 Experimental Botany* **46**, 1843-1852.
- 699 **Moison M, Roux F, Quadrado M, Duval R, Ekovich M, Lê D-H, Verzaux M, Budar F.**  
700 2010. Cytoplasmic phylogeny and evidence of cyto-nuclear co-adaptation in *Arabidopsis  
701 thaliana*. *The Plant Journal* **63**, 728-738.
- 702 **Monroe JG, Allen ZA, Tanger P, Mullen JL, Lovell JT, Moyers BT, Whitley D, McKay JK.**  
703 2017. TSPmap, a tool making use of traveling salesperson problem solvers in the efficient and  
704 accurate construction of high-density genetic linkage maps. *BioData Mining* **10**, 38.
- 705 **Moradi F, Ismail A, Gregorio G, Egdane J.** 2003. Salinity tolerance of rice during  
706 reproductive development and association with tolerance at the seedling stage. *Indian Journal of  
707 Plant Physiology* **8**.
- 708 **Munns R, Tester M.** 2008. Mechanisms of Salinity Tolerance. *Annual Review of Plant Biology*  
709 **59**, 651-681.

- 710 **Noor AUZ, Nurnabi Azad Jewel GM, Haque T, Elias SM, Biswas S, Rahman MS, Seraj ZI.**  
711 2019. Validation of QTLs in Bangladeshi rice landrace Horkuch responsible for salt tolerance in  
712 seedling stage and maturation. *Acta Physiologiae Plantarum* **41**, 173.
- 713 **Pearson GA, Bernstein L.** 1959. Salinity effects at several growth stages of rice. *Agronomy*  
714 *Journal* **51**, 654–657.
- 715 **Quarrie S, Pekic Quarrie S, Radosevic R, Rancic D, Kaminska A, Barnes J, Leverington**  
716 **M, Ceoloni C, Dodig D.** 2006. Dissecting a wheat QTL for yield present in a range of  
717 environments: from the QTL to candidate genes. *Journal of Experimental Botany* **57**, 2627-2637.
- 718 **Rahman MA, Thomson MJ, Shah-E-Alam M, de Ocampo M, Egdane J, Ismail AM.** 2016.  
719 Exploring novel genetic sources of salinity tolerance in rice through molecular and physiological  
720 characterization. *Annals of Botany* **117**, 1083-1097.
- 721 **Rao PS, Mishra B, Gupta SR, Rathore A.** 2008. Reproductive stage tolerance to salinity and  
722 alkalinity stresses in rice genotypes. *Plant Breeding* **127**, 256-261.
- 723 **Razzaque S, Elias SM, Haque T, Biswas S, Jewel GMNA, Rahman S, Weng X, Ismail AM,**  
724 **Walia H, Juenger TE, Seraj ZI.** 2019. Gene Expression analysis associated with salt stress in a  
725 reciprocally crossed rice population. *Scientific Reports* **9**, 8249.
- 726 **Razzaque S, Haque T, Elias SM, Rahman MS, Biswas S, Schwartz S, Ismail AM, Walia H,**  
727 **Juenger TE, Seraj ZI.** 2017. Reproductive stage physiological and transcriptional responses to  
728 salinity stress in reciprocal populations derived from tolerant (Horkuch) and susceptible (IR29)  
729 rice. *Scientific Reports* **7**, 46138.
- 730 **Ren Z-H, Gao J-P, Li L-G, Cai X-L, Huang W, Chao D-Y, Zhu M-Z, Wang Z-Y, Luan S,**  
731 **Lin H-X.** 2005. A rice quantitative trait locus for salt tolerance encodes a sodium transporter.  
732 *Nature Genetics* **37**, 1141.
- 733 **Rieseberg LH, Archer MA, Wayne RK.** 1999. Transgressive segregation, adaptation and  
734 speciation. *Heredity* **83**, 363-372.
- 735 **Roy SJ, Negrão S, Tester M.** 2014. Salt resistant crop plants. *Current Opinion in Biotechnology*  
736 **26**, 115-124.
- 737 **Sabouri H, Rezai AM, Moumeni A, Kavousi A, Katouzi M, Sabouri A.** 2009. QTLs mapping  
738 of physiological traits related to salt tolerance in young rice seedlings. *Biologia Plantarum* **53**,  
739 657-662.
- 740 **Sexcion FSH, Egdane JA, Ismail AM, Dionisio-Sese ML.** 2009. Morpho-physiological traits  
741 associated with tolerance of salinity during seedling stage in rice (*Oryza sativa* L.). *Phil J Crop*  
742 *Sci* **34**, 27-37.
- 743 **Shi J, Li R, Qiu D, Jiang C, Long Y, Morgan C, Bancroft I, Zhao J, Meng J.** 2009.  
744 Unraveling the Complex Trait of Crop Yield With Quantitative Trait Loci Mapping in *Brassica*  
745 *napus*. *Genetics* **182**, 851-861.
- 746 **Singh RK, Flowers TJ.** 2010. Physiology and Molecular Biology of the Effects of Salinity on  
747 Rice. *Handbook of Plant and Crop Stress, Third Edition*: CRC Press, 899-939.
- 748 **Soltani A, Kumar A, Mergoum M, Pirseyedi SM, Hegstad JB, Mazaheri M, Kianian SF.**  
749 2016. Novel nuclear-cytoplasmic interaction in wheat (*Triticum aestivum*) induces vigorous  
750 plants. *Functional & Integrative Genomics* **16**, 171-182.
- 751 **Tang Z, Yang Z, Hu Z, Zhang D, Lu X, Jia B, Deng D, Xu C.** 2013. Cytonuclear epistatic  
752 quantitative trait locus mapping for plant height and ear height in maize. *Molecular Breeding* **31**,  
753 1-14.
- 754 **Tester M, Davenport R.** 2003. Na<sup>+</sup> Tolerance and Na<sup>+</sup> Transport in Higher Plants. *Annals of*  
755 *Botany* **91**, 503-527.



- 756 **Thomson MJ, de Ocampo M, Egdane J, Rahman MA, Sajise AG, Adorada DL,**  
757 **Tumimbang-Raiz E, Blumwald E, Seraj ZI, Singh RK, Gregorio GB, Ismail AM.** 2010.  
758 Characterizing the Saltol Quantitative Trait Locus for Salinity Tolerance in Rice. *Rice* **3**, 148-  
759 160.
- 760 **Tian L, Tan L, Liu F, Cai H, Sun C.** 2011. Identification of quantitative trait loci associated  
761 with salt tolerance at seedling stage from *Oryza rufipogon*. *Journal of Genetics and Genomics*  
762 **38**, 593-601.
- 763 **Wang Z, Cheng J, Chen Z, Huang J, Bao Y, Wang J, Zhang H.** 2012. Identification of QTLs  
764 with main, epistatic and QTL × environment interaction effects for salt tolerance in rice  
765 seedlings under different salinity conditions. *Theoretical and Applied Genetics* **125**, 807-815.
- 766 **Xiao J, Li J, Grandillo S, Ahn SN, Yuan L, Tanksley SD, McCouch SR.** 1998. Identification  
767 of Trait-Improving Quantitative Trait Loci Alleles From a Wild Rice Relative, *Oryza rufipogon*.  
768 *Genetics* **150**, 899-909.
- 769 **Xue W, Xing Y, Weng X, Zhao Y, Tang W, Wang L, Zhou H, Yu S, Xu C, Li X, Zhang Q.**  
770 2008. Natural variation in *Ghd7* is an important regulator of heading date and yield potential in  
771 rice. *Nat Genet* **40**, 761-767.
- 772 **Yesmin N, Elias SM, Rahman MS, Haque T, Mahbub Hasan AKM, Seraj ZI.** 2014. Unique  
773 Genotypic Differences Discovered among Indigenous Bangladeshi Rice Landraces. *International*  
774 *Journal of Genomics* **2014**, 11.
- 775 **Zang J, Sun Y, Wang Y, Yang J, Li F, Zhou Y, Zhu L, Jessica R, Mohammadhosein F, Xu**  
776 **J, Li Z.** 2008. Dissection of genetic overlap of salt tolerance QTLs at the seedling and tillering  
777 stages using backcross introgression lines in rice. *Science in China Series C: Life Sciences* **51**,  
778 583-591.
- 779 **Zeng L, Shannon MC.** 2000. Salinity Effects on Seedling Growth and Yield Components of  
780 Rice. **40**, 996-1003.
- 781 **Zheng H, Wang J, Zhao H, Liu H, Sun J, Guo L, Zou D.** 2015. Genetic structure, linkage  
782 disequilibrium and association mapping of salt tolerance in japonica rice germplasm at the  
783 seedling stage. *Molecular Breeding* **35**, 152.

784

785 Table1: Descriptive statistics of phenotypes measured at seedling and reproductive stages under salinity stress.

|                       | Phenotypes                                           | Abbreviation      | Population |       | Parent         |              |
|-----------------------|------------------------------------------------------|-------------------|------------|-------|----------------|--------------|
|                       |                                                      |                   | Mean       | SD    | <i>Horkuch</i> | <i>IR29</i>  |
| Seedling<br>Stage     | Shoot Relative Water Content (%)                     | SRWC              | 70.06      | 5.07  | 67.72          | 62.43        |
|                       | Standard Evaluation System (number score)            | SES               | 5.83       | 0.99  | <b>5.60</b>    | <b>7.80</b>  |
|                       | Shoot Length (cm)                                    | SL                | 38.09      | 4.64  | <b>41.78</b>   | <b>21.35</b> |
|                       | Root Length (cm)                                     | RL                | 10.71      | 2.15  | <b>11.51</b>   | <b>7.60</b>  |
|                       | Total Chlorophyll *** (mg chl per gram fresh weight) | Tchl <sub>r</sub> | 5.04       | 0.92  | <b>5.31</b>    | <b>3.38</b>  |
|                       | Total Sodium *** (mmol/g dry wt)                     | TNa               | 3.07       | 0.77  | <b>3.08</b>    | <b>6.23</b>  |
|                       | Total Potassium *** (mmol/g dry wt)                  | TK                | 0.38       | 0.08  | <b>0.38</b>    | <b>0.21</b>  |
|                       | Potassium by Sodium (ration) **                      | K/Na              | 0.14       | 0.04  | <b>0.13</b>    | <b>0.04</b>  |
| Reproductive<br>Stage | Plant Height (cm)                                    | PH                | 104.5      | 17.61 | <b>129.81</b>  | <b>75.50</b> |
|                       | Panicle Exsertion (%) ***                            | PE                | 99.24      | 1.42  | 100.00         | 98.81        |
|                       | Total Tiller*** (number)                             | TT                | 4.66       | 1.16  | 5.07           | 4.36         |
|                       | Effective Tiller (number)                            | ET                | 3.43       | 0.8   | <b>3.87</b>    | <b>3.23</b>  |
|                       | Filled Grain Number (number) ***                     | FGN               | 140.87     | 92.96 | 156.29         | 149.85       |
|                       | Filled Grain Weight (gm) ***                         | FGW               | 2.85       | 1.95  | <b>3.91</b>    | <b>2.00</b>  |
|                       | Spikelet Fertility (%) ***                           | SF                | 48.63      | 15.93 | <b>49.4</b>    | <b>45.08</b> |
|                       | Days to Flower (day) ***                             | DF                | 72.08      | 9.83  | <b>101.93</b>  | <b>66.60</b> |
|                       | Harvest Index*** (ratio)                             | HI                | 0.26       | 0.12  | 0.23           | 0.32         |

786

787 Asterisks indicates significant effect of cytoplasm (\*\* for P < 0.01, \* for P < 0.05). For the  
 788 parent's column, trait values in bold character indicate significant difference between the group means of two  
 789 parents (p-value < 0.05)

790

791

792

793 \

794

795

Table 2: QTL models

| Phenotypes | QTL model         | Chr | Position | LOD   | Lower CI | Upper CI | Positive Allele      |
|------------|-------------------|-----|----------|-------|----------|----------|----------------------|
| SL         | qSL.1@183         | 1   | 183.00   | 13.42 | 175.11   | 190.57   | Horkuch              |
| SL         | qSL.3@218         | 3   | 218.00   | 4.82  | 212.12   | 236.45   | Horkuch              |
| SL         | qSL.5@160         | 5   | 160.43   | 3.83  | 102.86   | 170.27   | Horkuch              |
| RL         | qRL.2@167         | 2   | 167.00   | 10.67 | 161.14   | 176.67   | Horkuch              |
| TK         | qTK.2@45* Cyto    | 2   | 45.00    | 6.11  | 24.05    | 66.99    | Horkuch <sup>†</sup> |
| TK         | qTK.3@204* Cyto   | 3   | 203.78   | 6.46  | 194.44   | 209.29   | Horkuch <sup>†</sup> |
| PH         | qPH.1@215         | 1   | 215.00   | 5.59  | 175.11   | 222.54   | Horkuch              |
| PH         | qPH.3@211         | 3   | 211.02   | 5.15  | 203.78   | 272.38   | Horkuch              |
| PH         | qPH.5@144 * Cyto  | 5   | 144.00   | 6.64  | 124.73   | 170.27   | Horkuch <sup>†</sup> |
| ET         | qET.7@97 * Cyto   | 7   | 97.00    | 5.82  | 85.83    | 104.41   | Horkuch              |
| FGN        | qFGN.10@58 * Cyto | 10  | 58.48    | 7.72  | 50.30    | 107.07   | IR29                 |
| FGW        | qFGW.10@58 * Cyto | 10  | 58.48    | 9.13  | 50.30    | 107.07   | IR29                 |
| SF         | qSF.10@59 * Cyto  | 10  | 59.00    | 7.71  | 50.30    | 107.07   | IR29                 |
| HI         | qHI.10@104+ Cyto  | 10  | 103.75   | 8.48  | 50.30    | 107.07   | IR29                 |

796 Each QTL model was built by linear mixed model using kinship matrix as a covariate. \*cytoplasm denotes  
 797 interaction whereas (+) sign denotes only additive cytoplasmic effect in the QTL model. † denotes to QTL that has  
 798 both main and interaction effect therefore only considering main effect direction can be misleading

799

800

801

802

803

804

805

806

807

808

809 Figure 1: Frequency distribution of traits showing transgressive segregation in the F<sub>2</sub> population  
810 and the individual subsets of cross directions. Blue and orange histograms indicate samples from  
811 *Horkuch*♀ and *IR29*♀ cytoplasm respectively. Curves in blue and orange indicate distribution  
812 plots of *Horkuch*♀ and *IR29*♀ cytoplasm respectively and dotted curve in black indicates the  
813 distribution plot of total population. Parental values are marked by a dotted vertical line where  
814 blue indicates *Horkuch* and orange indicates *IR29*.

815 Figure 2: PCA on trait correlations in the F<sub>2</sub> mapping population. Each point represents the  
816 genetic means of each F<sub>2</sub> family whereas the shape of point indicates the cytoplasm (cross  
817 direction). Direction of variation for axis 1 and 2 of each trait has been plotted as arrow and are  
818 color labelled depending on two different treatment stages: green indicates Seedling stage  
819 treatment and red indicates reproductive stage treatment. Labels of traits are printed close to the  
820 arrow-head. Small insert-plot at the bottom-right shows the correlations of traits where brown  
821 color shows positive correlation and light-blue indicates negative correlation. Traits labelled with  
822 green color indicates seedling stage ones and red indicates reproductive stage traits.

823 Figure 3: Illustration of QTL across chromosomes. QTL are denoted as a point and 1.5 LOD  
824 drop confidence intervals extended to a true marker is indicated by the bar for each QTL. Peaks of  
825 the QTL were marked as black line in QTL intervals. QTL from same trait are marked with  
826 same color. Line width represents the magnitude of LOD score. Genomic regions that showed  
827 significant association with cytoplasm are marked here with black line segment.

828 Figure 4: Interaction plots of allelic effect of QTL and cytoplasm on different traits from two  
829 different treatment stages. Blue line shows plants with *Horkuch* cytoplasm whereas orange line  
830 indicates plants with *IR29* cytoplasm. Alleles are plotted on x-axis where AA, AB and BB  
831 indicate homozygous *Horkuch*, heterozygous of *Horkuch/IR29* and homozygous *IR29*  
832 respectively. Allelic means +/- SE are reported. Representative QTL effects for SL and PH are  
833 presented in the upper panel and exhibit no significant interaction with cytoplasm. The third plot  
834 from the left on upper panel demonstrates significant additive effects of the maternal cytoplasm  
835 on TK. In the bottom panel, plot two and three from the left demonstrate significant interaction  
836 of QTL alleles with cytoplasm for traits such as FGW, ET.

837

838

839

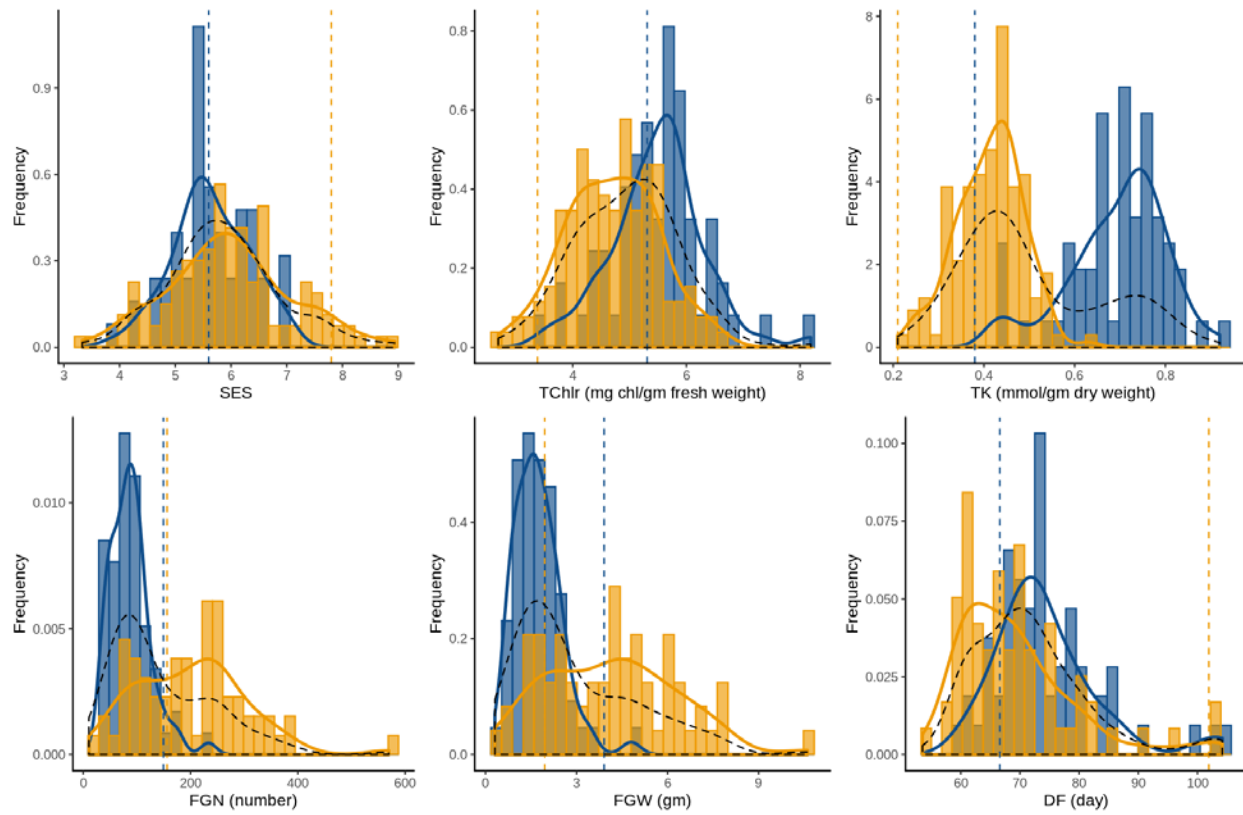

840

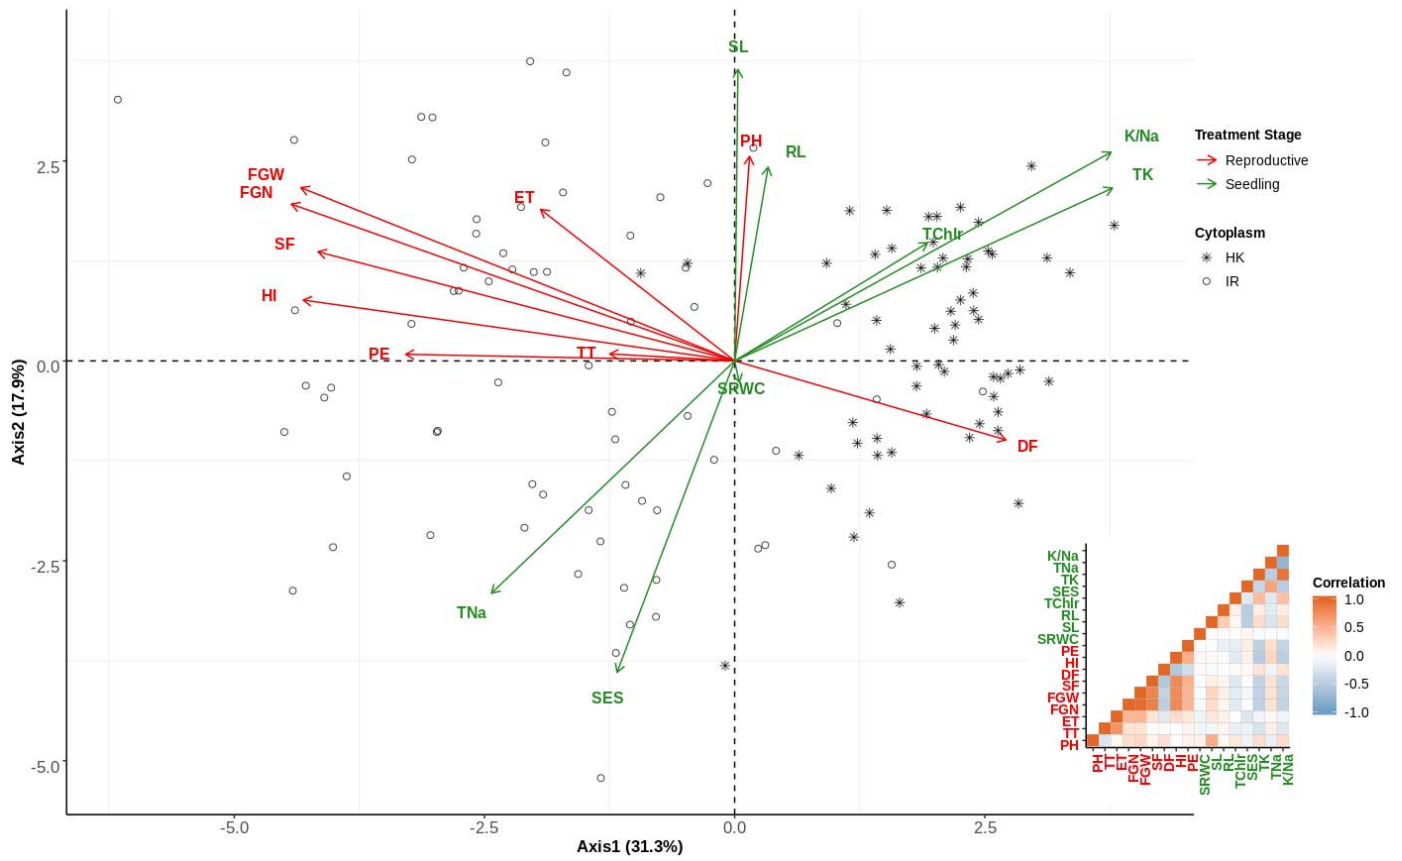

841

842

843

844

845

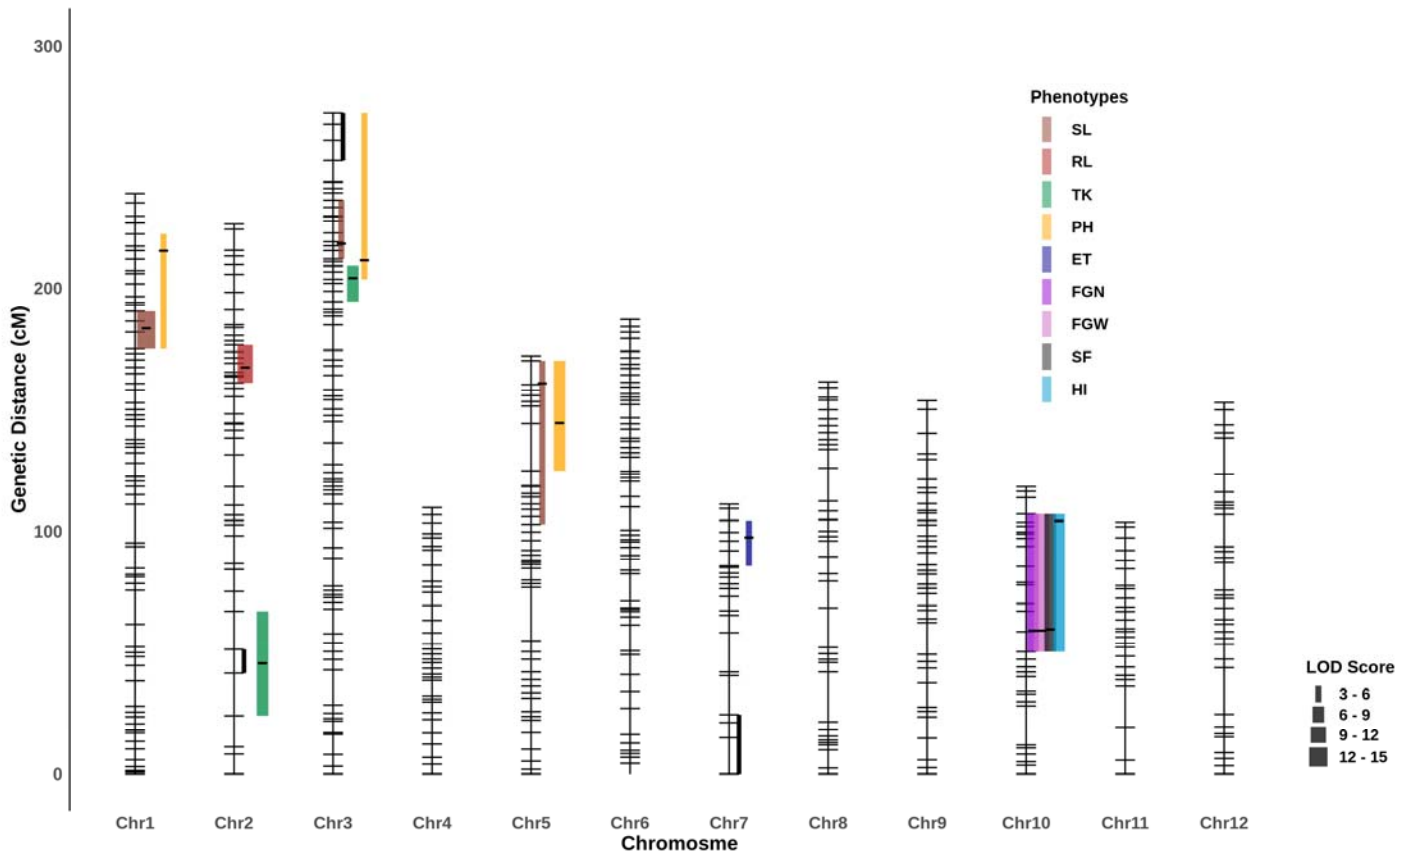

846

847

848

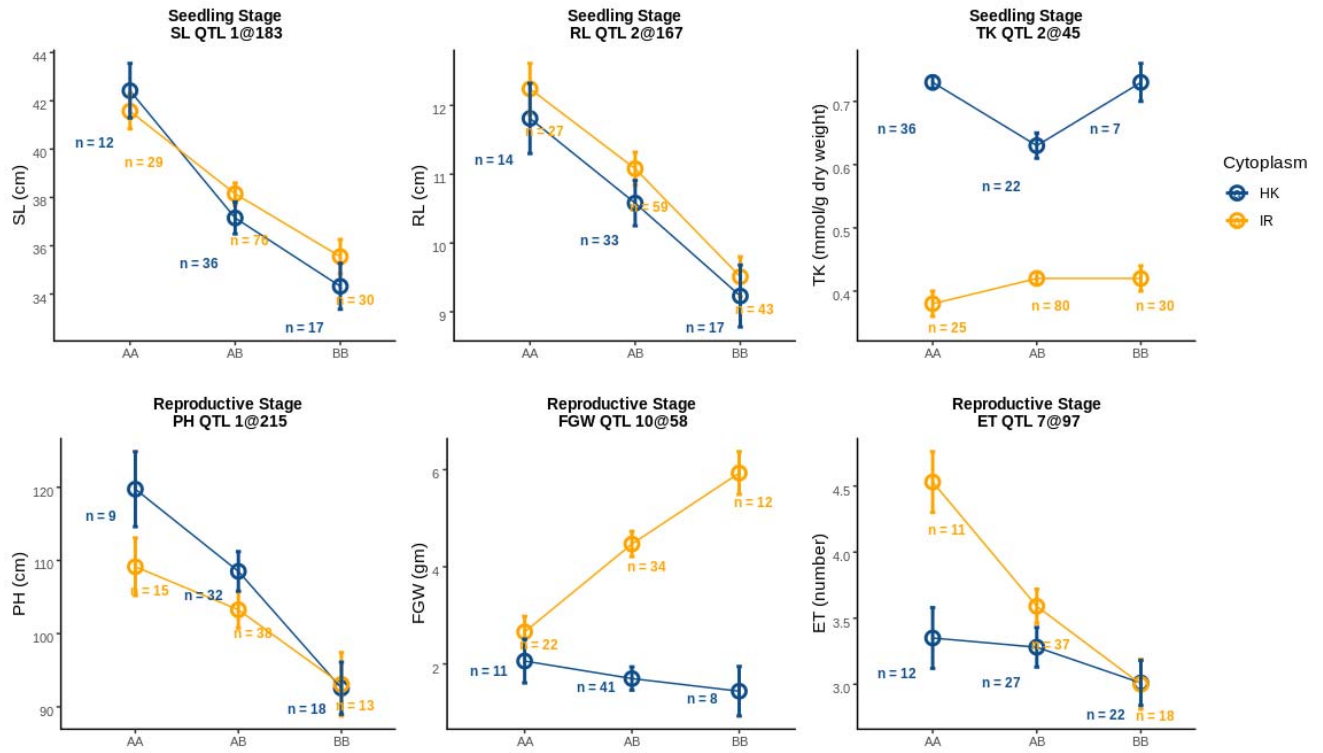

849

850
